# Supplementary material for: Arabidopsis MSH1 mutation alters the epigenome and produces heritable changes in plant growth
Source: PubMed Central journal article supplement (PMC4351625; doi:10.1038/ncomms7386), 2015-02-27
Supplement: ncomms7386-s1.pdf [file ncomms7386-s1.pdf]

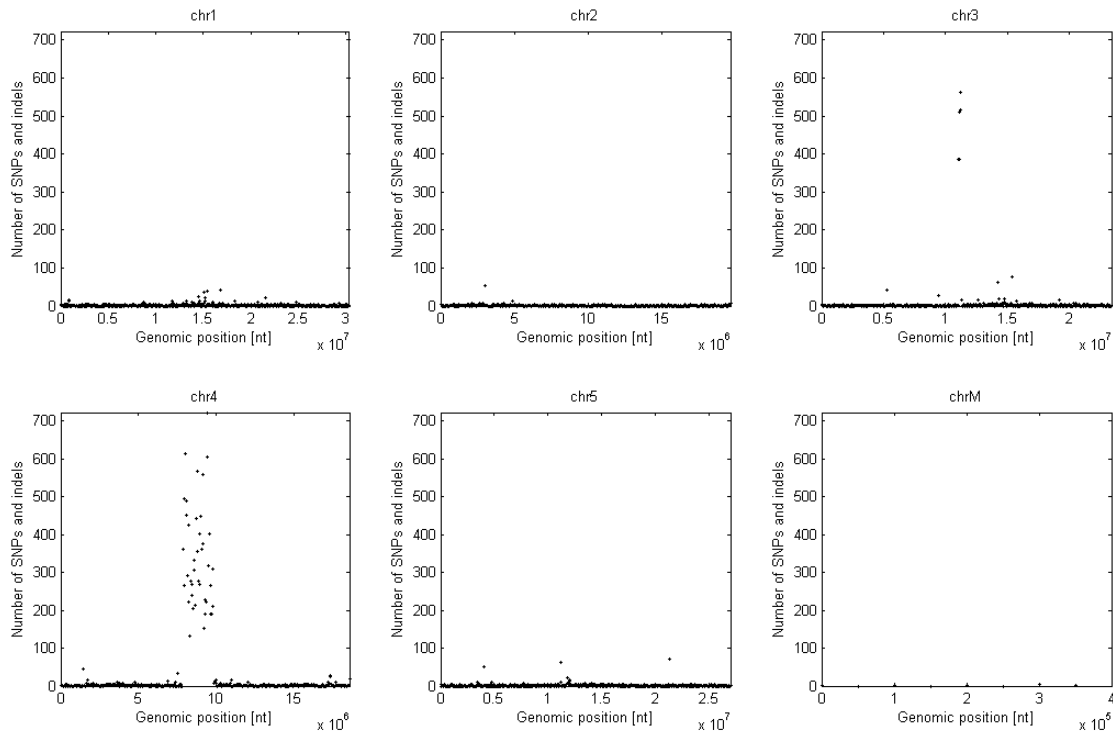

**Supplementary Figure 1.** Distribution of *msh1* SNPs and indels versus Col-0 across the genome. Each dot represents the number of SNPs and indels found in a window of 50kbp. Note that the Y-axis has been synchronized with the maximum number found on chr4 to enable comparisons between chromosomes. The region 7,800,000 – 9,850,000 bp on chr4, a likely introgressed segment from *Ler*, contains 8582 of the total 12,771 SNPs and indels. The overlap between these data and the known SNPs and small indels of *Ler* vs. Col-0<sup>32</sup> is 72% and 67% for SNPs and indels, respectively. Paired-end genome-wide sequencing, alignment and *de novo* partial assembly of the *chm1-1* genome produced 14,416 contigs (n50 = 40,761 bp) containing 118.5 Mbp; mapping these contigs against Col-0 covers 72Mbp. Alignment of paired-end reads to the Col-0 public reference sequence produced 95% alignment and identified 12,771 SNPs and indels, with the one 2-Mbp interval, on chromosome 4, accounting for 8,582 and the second on Chromosome 3 accounting for 2200. The *chm1-1* mutant used in this study is a Col-0 mutant once crossed to *Ler*<sup>24</sup>, and the *Ler* introgressed segment on Chromosome 3 was identified genetically during positional cloning of *MSH1*<sup>10</sup>. Comparing SNPs and indels in the chromosome 4 interval with those in a recent study of *Ler* x Col-0<sup>32</sup> accounts for 5060 of 6985 SNPs (72%) and 1073 of 1597 indels (67%), consistent with a *Ler* introgressed segment. Of the remaining 1988 SNP/indels, about 70% reside in non-genic regions. This SNP mutation rate appears consistent with natural SNP frequencies<sup>14</sup>.

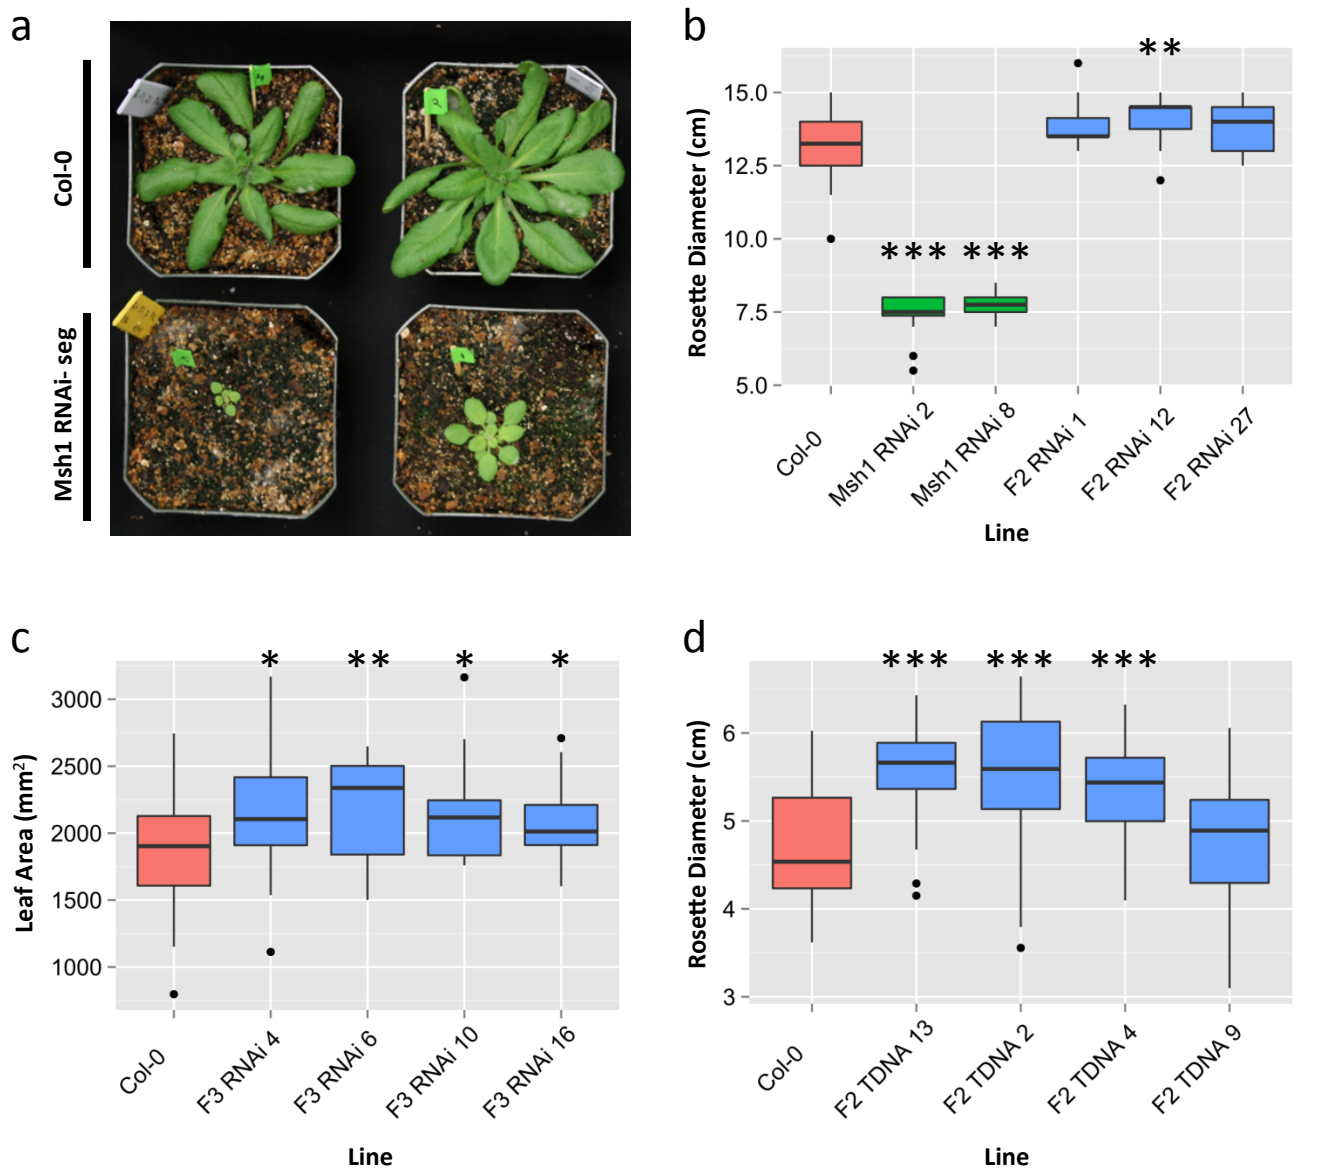

**Supplementary Figure 2.** Corresponding behavior in *MSH1* RNAi suppression and *msh1* T-DNA insertion lines. **a**, Null segregants (bottom row) for *msh1* RNAi transgene from self-pollinated hemizygous RNAi parents showing the dwarf phenotype. Top row, untransformed wild type Col-0. **b**, Rosette diameter of wild type Col-0, *msh1* RNAi null segregants, and F<sub>2</sub> plants of crosses between Col-0 and *msh1* RNAi null segregants grown at 12 hour day length. **c**, Leaf area measurements of F3 plants from selected F2 lines derived from Col-0 and *msh1* RNAi null crosses. **d**, Rosette diameter of greenhouse-grown F2 plants from crosses between Col-0 and third generation *msh1* T-DNA mutants. Shown are three lines exhibiting enhanced growth and one line resembling Col-0 from a total of 15 original crosses. Significance was calculated using the Wilcoxon Rank-Sum test. P-values less than 0.05(\*), 0.01(\*\*), and 0.001(\*\*\*)

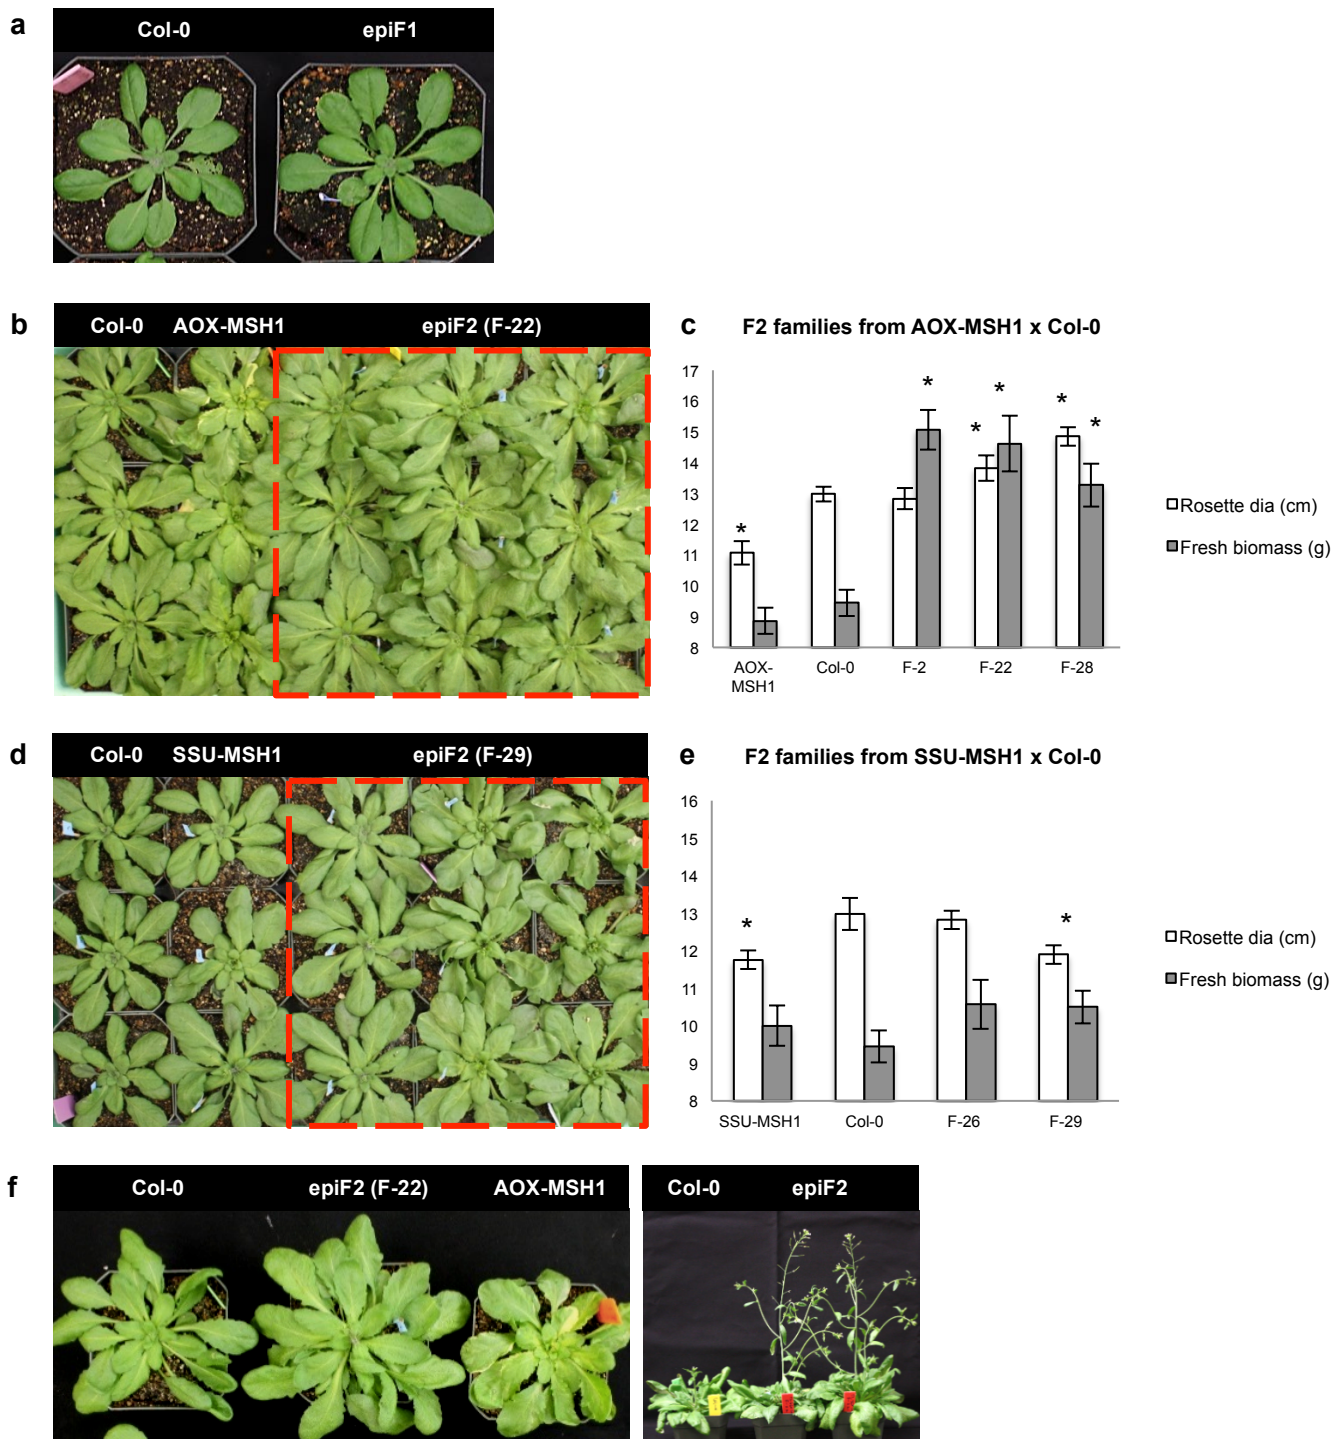

**Supplementary Figure 3.** MSH1-mediated enhanced growth from crossing is associated with plastid effects. **a**, Mitochondrial hemi-complementation line AOX-MSH1 x Col-0 F1. **b**, Mitochondrial-complemented AOX-MSH1 x Col-0 F2 showing enhanced growth. **c**, Rosette diameter and fresh biomass of AOX-MSH1-derived F2 lines is significantly greater than Col-0 (\*  $p < 0.05$ ). **d**, Plastid-complemented SSU-MSH1 x Col-0 F2 appears similar to wild type Col-0. **e**, Rosette diameter and fresh biomass of SSU-MSH1-derived F2 lines compared to Col-0. **f**, Enhanced growth phenotype in the F2 generation of AOX-MSH1 x Col-0.

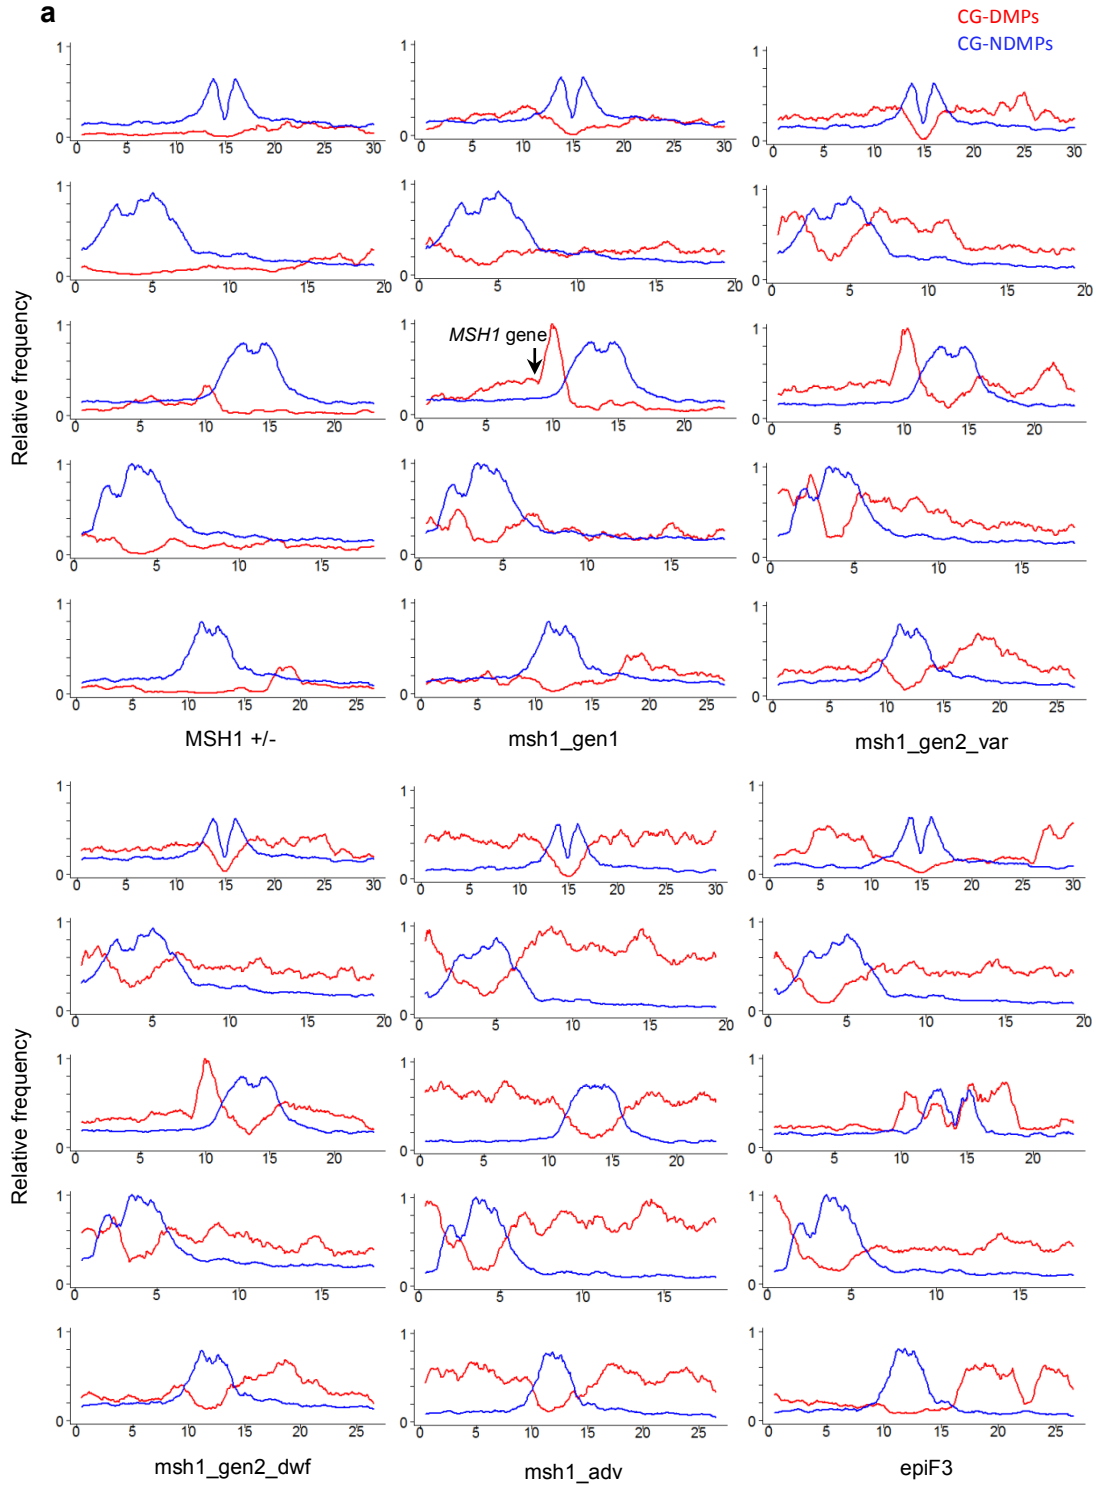

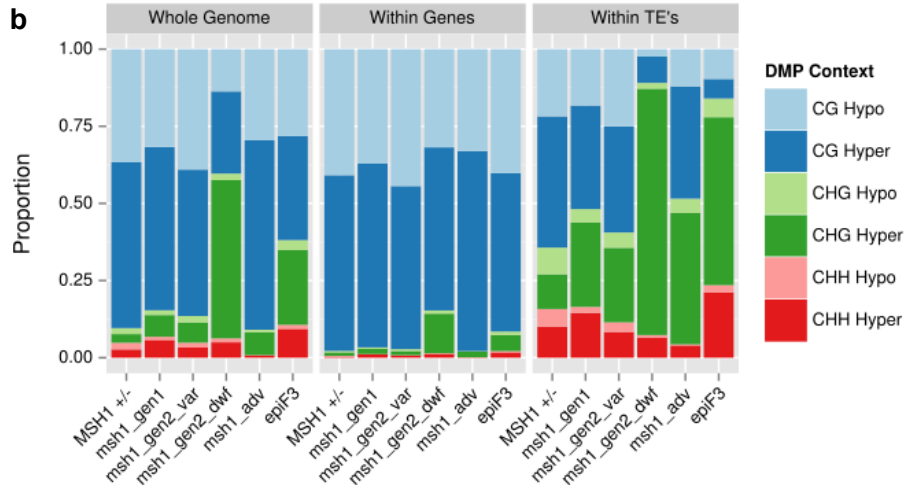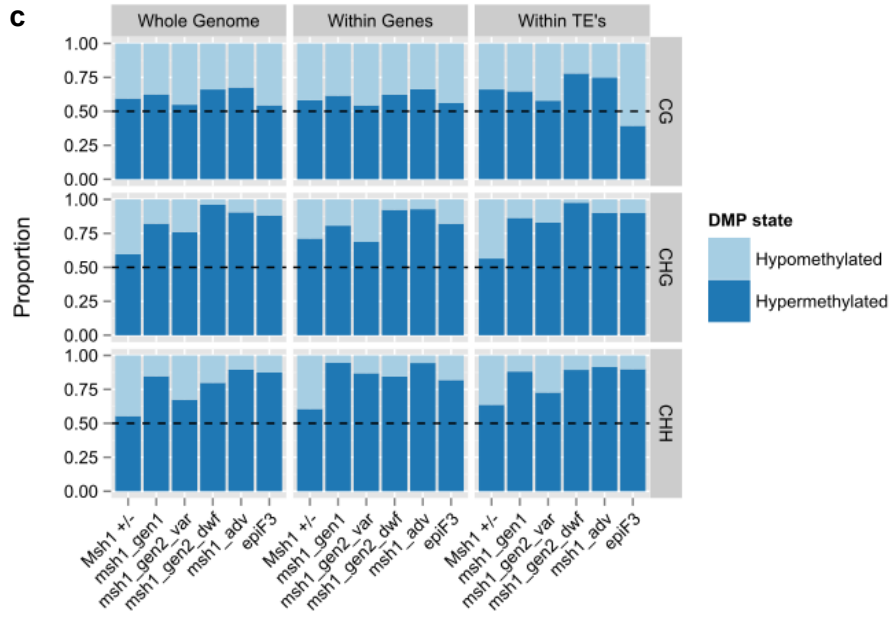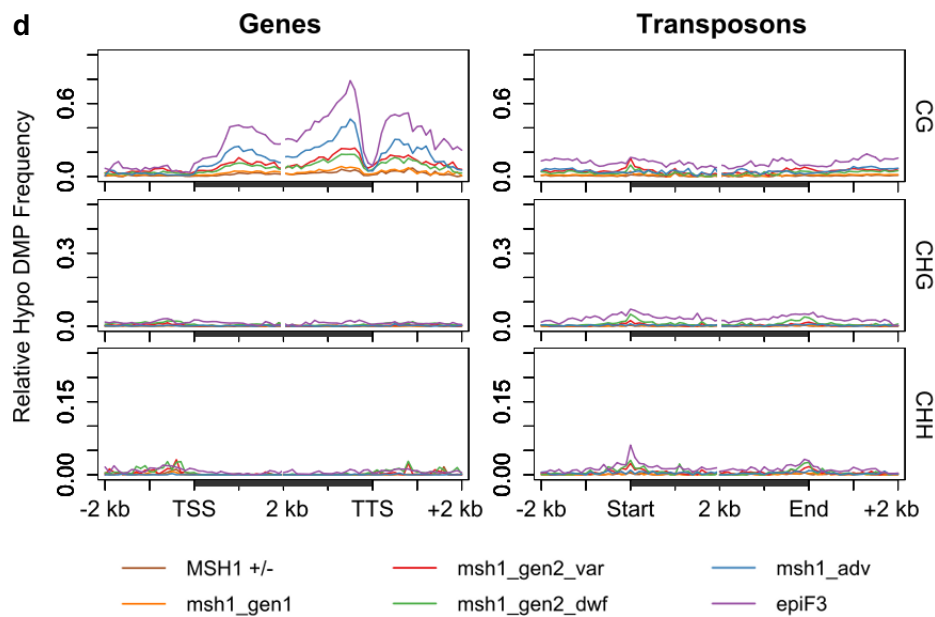

**Supplementary Figure 4.** Distribution of methylome changes in the *msh1* and *epiF3* lines. **a**, Chromosomal distributions of pair-wise CG-DMPs (red) and CG-NDMPs (blue), in a comparison of *MSH1* +/-, first generation *msh1*, second generation variegated *msh1*, and second generation dwarf *msh1* versus wild type segregant (normalized together), as well as advanced *msh1* and *epiF3* versus Col-0 (normalized together). Arrow on *msh1\_gen1* indicates the position of the *MSH1* gene on chromosome 3. **b**, Proportion of pair-wise DMPs composed of each cytosine context within genes, transposons, and the whole genome. *msh1* second generation dwarf and *epi-F3* show disproportionately high levels of CHG hypermethylation, particularly within transposons. **c**, Separate plots by cytosine context for comparison of relative hypermethylated pair-wise DMPs and hypomethylated pair-wise DMPs. *msh1* and *epiF3* mutants showing higher a trend of hypermethylation, except for transposon CG methylation in *epiF3*. **d**, Distribution of hypomethylated pair-wise DMPs across genes and transposons, by cytosine context.

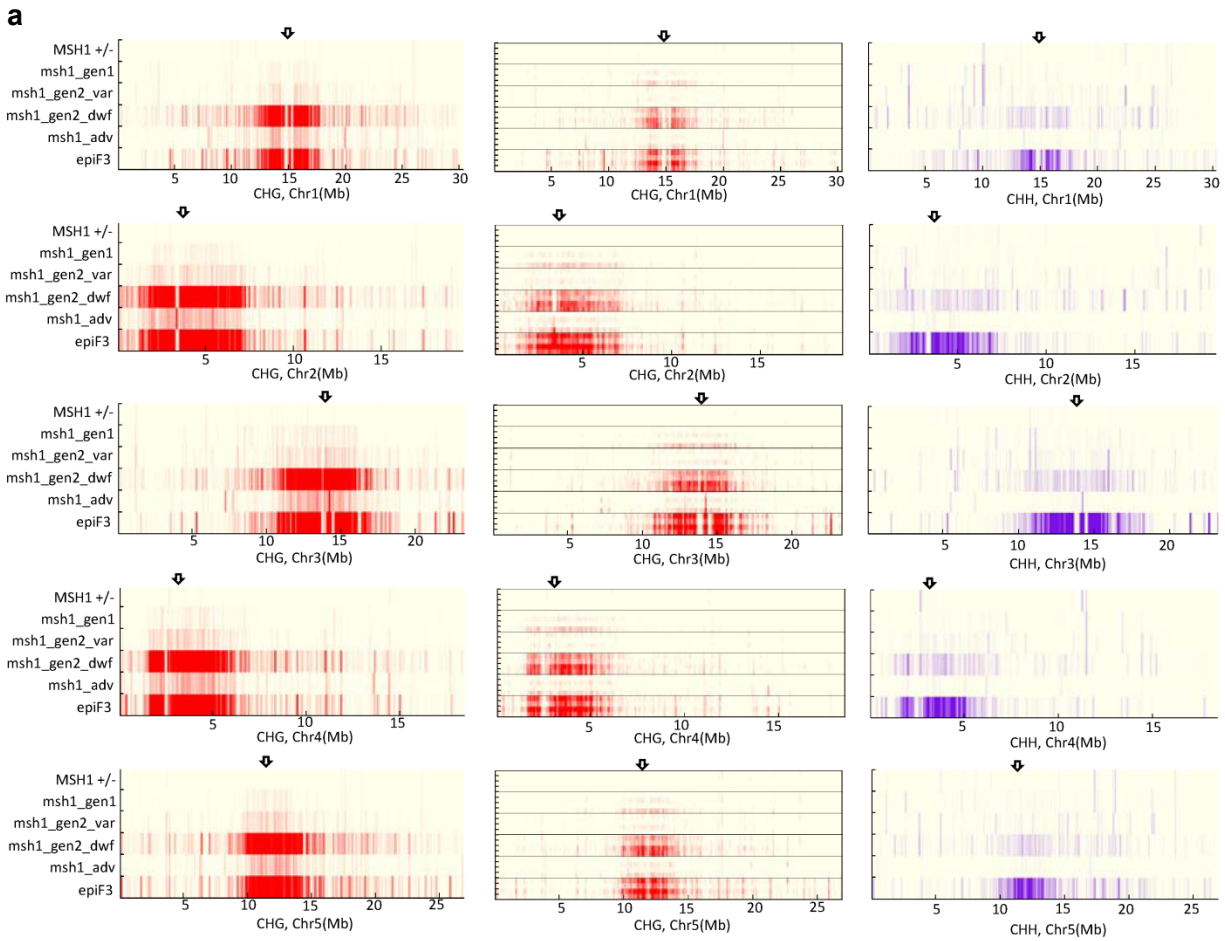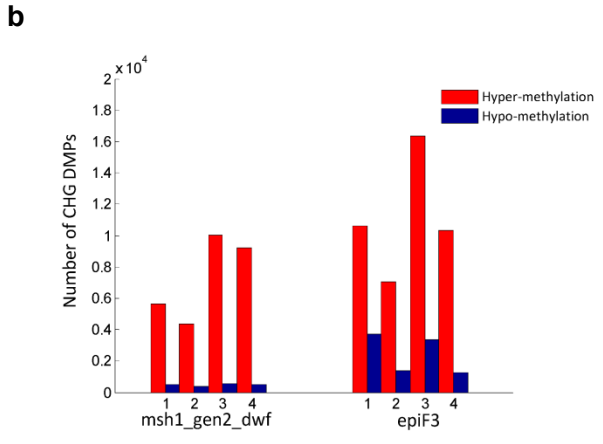

**Supplementary Figure 5. Non-CG methylation changes in the *msh1* TDNA mutant and epiF3.** **a**, Heat maps of pair-wise CHG-DMPs by chromosome using pooled samples (left), and individual samples with cross-comparisons in the order: mutant\_rep1 vs wildtype\_rep1, mutant\_rep2 vs wildtype\_rep1, mutant\_rep1 vs wildtype\_rep2, mutant\_rep2 vs wildtype\_rep2 (middle). Heat map of pair-wise CHH-DMPs by chromosome using pooled samples (right). Approximate location of centromere is indicated by arrows. **b**, Pair-wise CHG-DMP numbers in the cross-comparisons for *msh1\_gen2\_dwf* and *epiF3*, maintaining the same order as in the heat map.

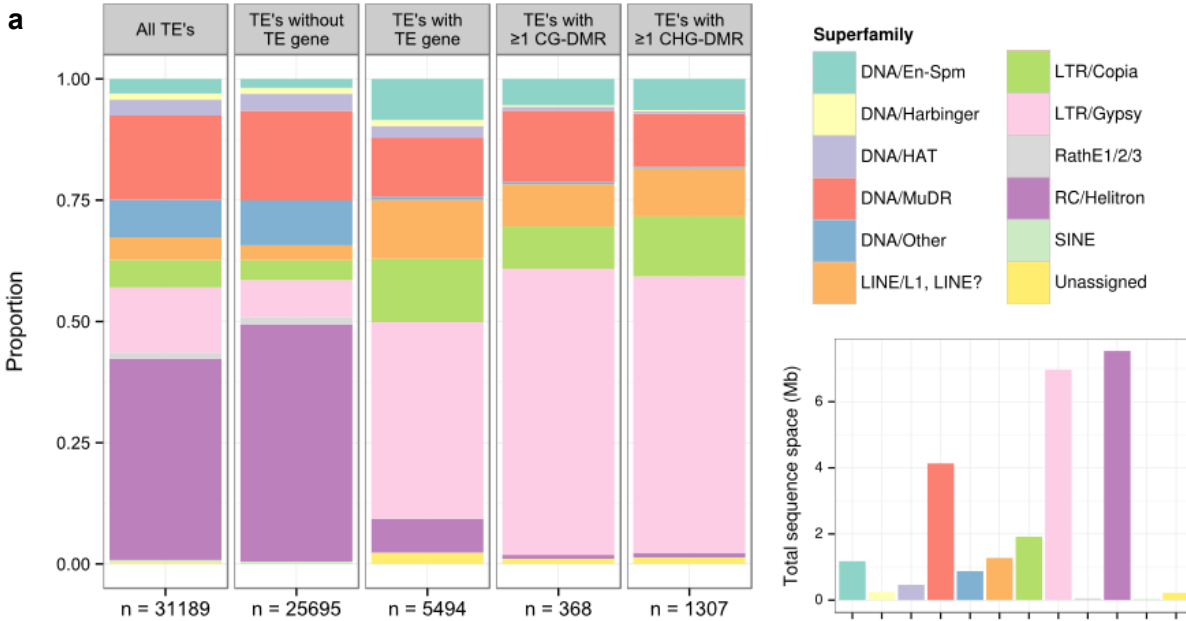

**b**

| Superfamily    | All TE's (n = 31189) | With $\geq 1$ CG-DMR (n = 368 <sup>†</sup> ) |              |              | With $\geq 1$ CHG-DMR (n = 1307 <sup>†</sup> ) |              |              |
|----------------|----------------------|----------------------------------------------|--------------|--------------|------------------------------------------------|--------------|--------------|
|                | Count                | Count                                        | Change       | Adj. p-value | Count                                          | Change       | Adj. p-value |
| DNA/En-Spm     | 941                  | 20                                           | --           | --           | 84                                             | --           | --           |
| DNA/Harbinger  | 379                  | 1                                            | --           | --           | 3                                              | <b>Under</b> | 2.49e-03     |
| DNA/HAT        | 1035                 | 3                                            | --           | --           | 7                                              | <b>Under</b> | 2.22e-03     |
| DNA/MuDR       | 5410                 | 54                                           | --           | --           | 143                                            | <b>Under</b> | 4.32e-06     |
| DNA/Other      | 2419                 | 2                                            | <b>Under</b> | 6.63e-03     | 4                                              | <b>Under</b> | 8.44e-10     |
| LINE/L1, LINE? | 1447                 | 32                                           | <b>Over</b>  | 0.0176       | 130                                            | <b>Over</b>  | 1.75e-08     |
| LTR/Copia      | 1781                 | 32                                           | --           | --           | 161                                            | <b>Over</b>  | 0.0201       |
| LTR/Gypsy      | 4181                 | 217                                          | <b>Over</b>  | 2.24e-23     | 745                                            | <b>Over</b>  | 4.01e-75     |
| RathE1/2/3     | 391                  | 0                                            | --           | --           | 0                                              | --           | --           |
| RC/Helitron    | 12945                | 3                                            | <b>Under</b> | < 1.00e-75   | 12                                             | <b>Under</b> | < 1.00e-75   |
| SINE           | 131                  | 0                                            | --           | --           | 0                                              | --           | --           |
| Unassigned     | 129                  | 4                                            | --           | --           | 18                                             | --           | --           |

<sup>†</sup> Many transposons contained more than one group-wise DMR. In total, 618 group-wise CG-DMRs and 4071 group-wise CHG-DMRs were identified.

**Supplementary Figure 6.** Transposon types altered in methylation. **a**, By count, *Gypsy*-like retrotransposons are highly enriched among transposons overlapping group-wise CG and CHG-DMRs in our material. To a lesser degree *LINE* and (for CHG) *Copia*-like elements are also enriched. This superfamily distribution generally resembles that of transposons which are associated with an intact transposable element gene. Bottom right: enrichment of particular superfamilies is unlikely to be an artifact from the amount of sequence space occupied by those superfamilies across the genome. **b**, Table of counts for each transposon superfamily, with Benjamini-Hochberg adjusted p-values for significantly under or over-represented superfamilies (based on Wallenius' non-central hypergeometric distribution) overlapping with group-wise DMRs. For this test, transposons were weighted by median superfamily sequence length to counter potential length bias in DMR overlap.



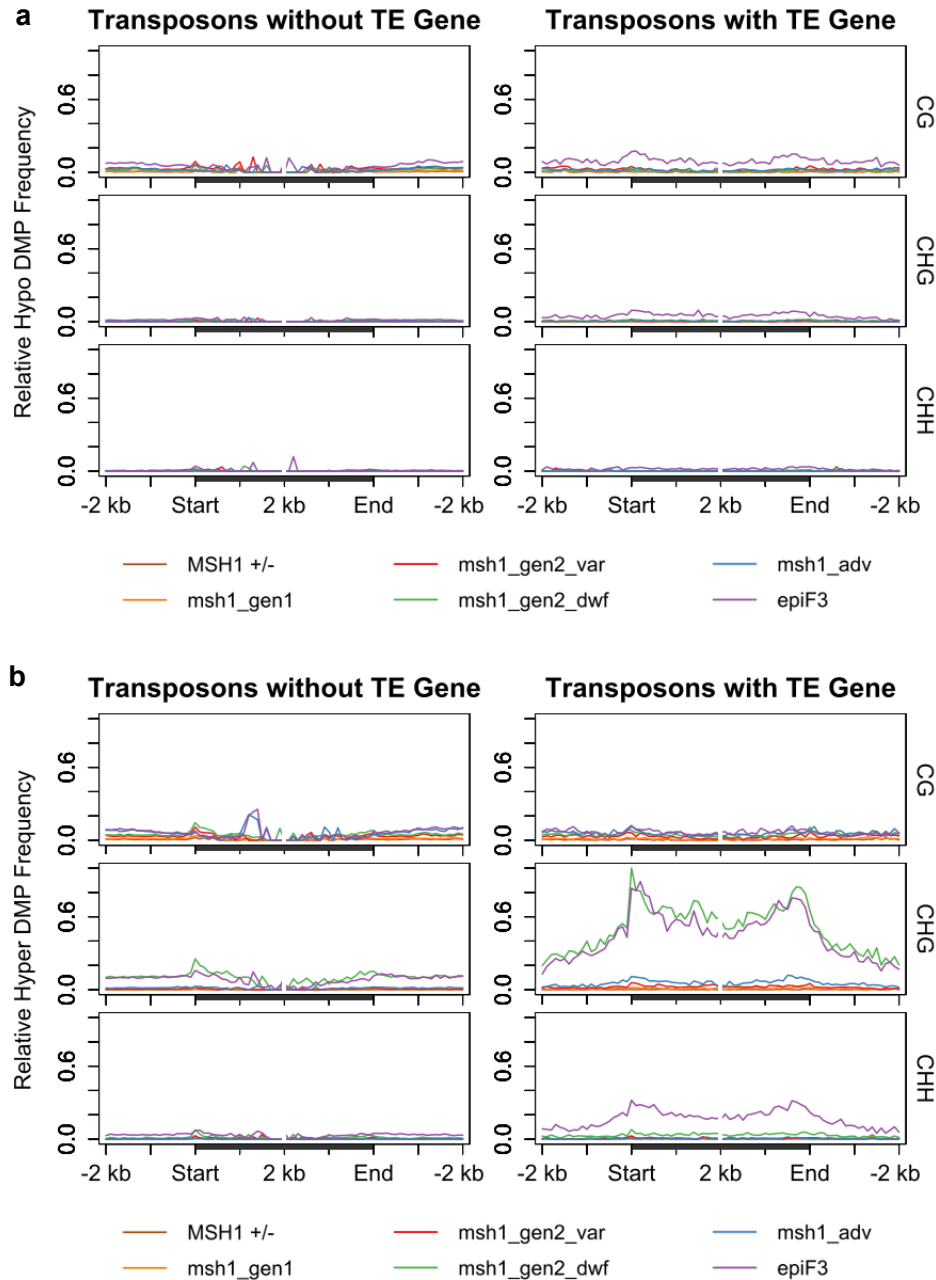

**Supplementary Figure 7.** Distribution of relative (a) hypermethylated and (b) hypomethylated pairwise DMP frequencies across transposable elements that do not contain or overlap with a TE gene (n = 25695) and those that do contain or overlap with a TE gene (n = 5494), by cytosine context. Unsurprisingly, transposons not associated with a TE gene are typically shorter than those that are (median bp length = 251 and 1194, respectively; Wilcoxon test p-value <  $2.2 \times 10^{-16}$ ). Fluctuations in CG-DMP frequencies within bodies of transposons that are not associated with a TE gene are due to the relatively small number of such transposons that are long in sequence length.

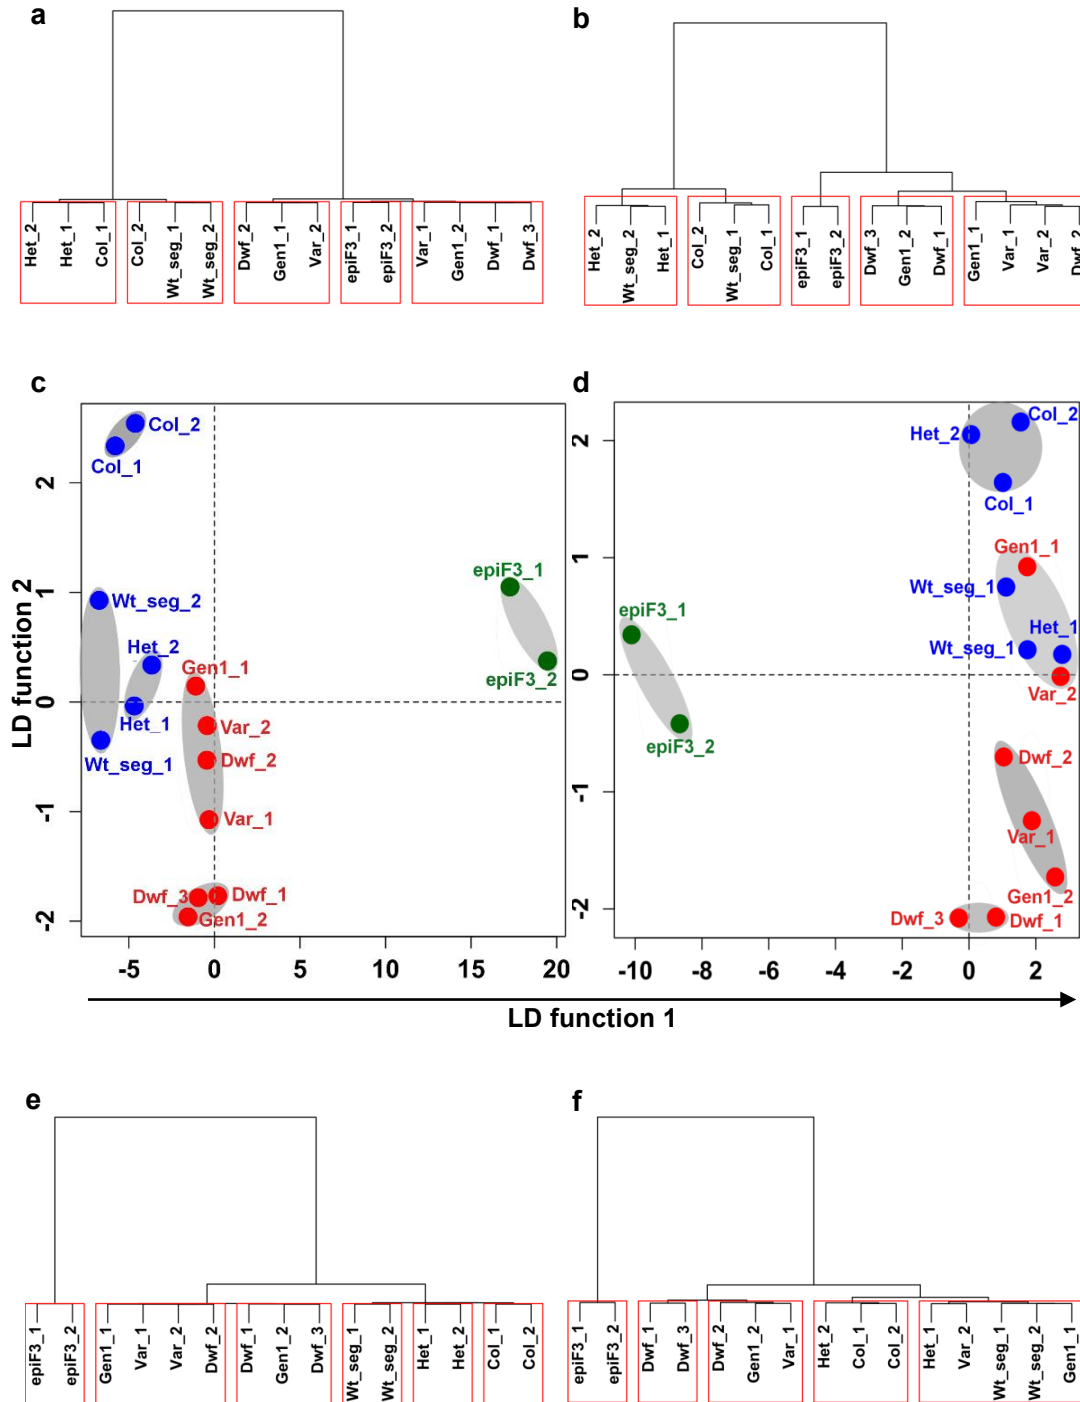

**Supplementary Figure 8.** Clustering based on the LDA coordinates of the samples. Hierarchical clustering for (a) CG and (b) CHG methylation of the LDA presented in Fig 3A and B of the main text, respectively. LDA for (c) CG and (d) CHG methylation regions of window size of 340 bp with at least 20 cytosine covered sites; panels (e) and (f) are their corresponding hierarchical clustering,

**a**

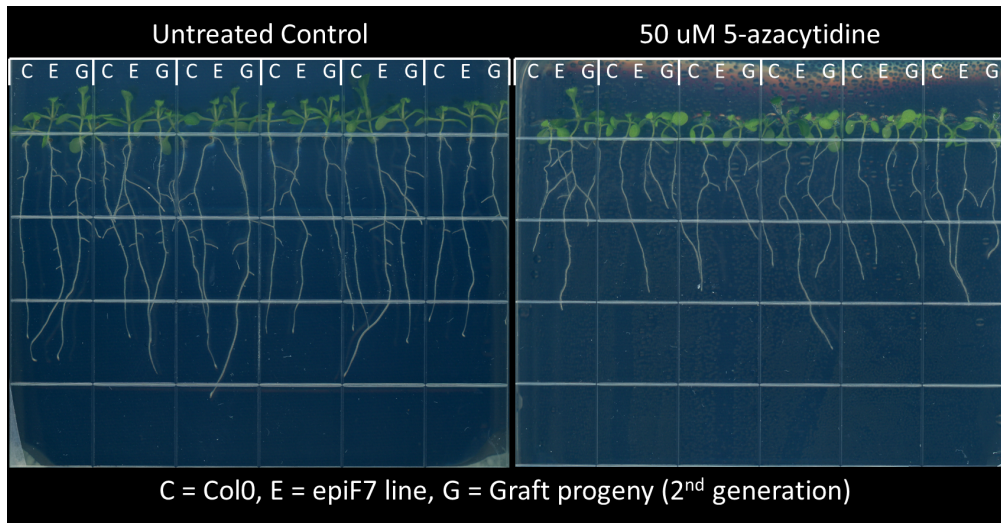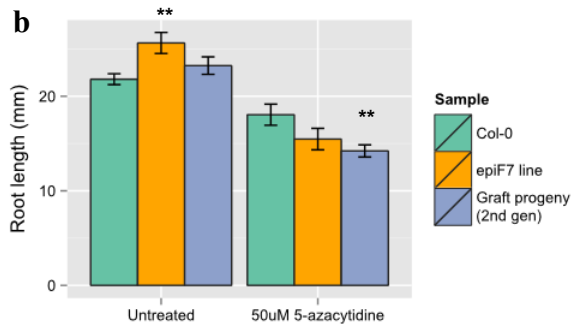

\*\* Significant compared to Col-0 with same treatment, at  $p < 0.01$ .

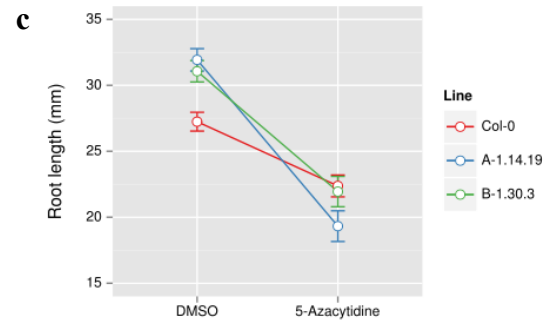

**Supplementary Figure 9.** Epi-lines are disproportionately affected by 5-azacytidine treatment. **a**, For treatment of seedlings with the methylation inhibitor 5-azacytidine, seeds were alternately arranged as shown to minimize the effect of spatial variation. **b**, Increased epi-line root length is abolished by 50  $\mu$ M 5-azacytidine. To assess the significance of the differences between the lines under control treatment versus 5-azacytidine, root length data was fit to the linear model  $Y_{ijk} = line_i + treatment_j + (line * treatment)_{ij} + \epsilon_{ijk}$ ; two-way ANOVA then indicated that the *line \* treatment* interaction term was significant ( $F = 6.60$ ,  $df = 2$ ,  $p$ -value = 0.002). **c**, An independent set of root length assays highlights the disproportional reduction of root length in epi-line seedlings. The two chosen epi-lines show signs of enhanced vigor early in development, including an approximately 20% increase in root length, which is abolished when grown in media containing 30  $\mu$ M 5-azacytidine.

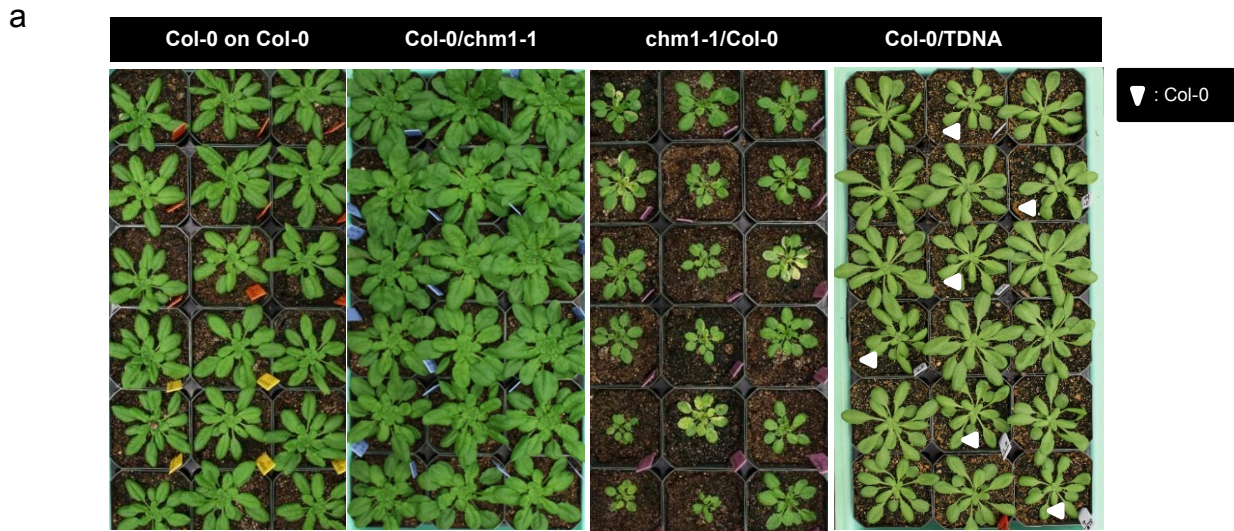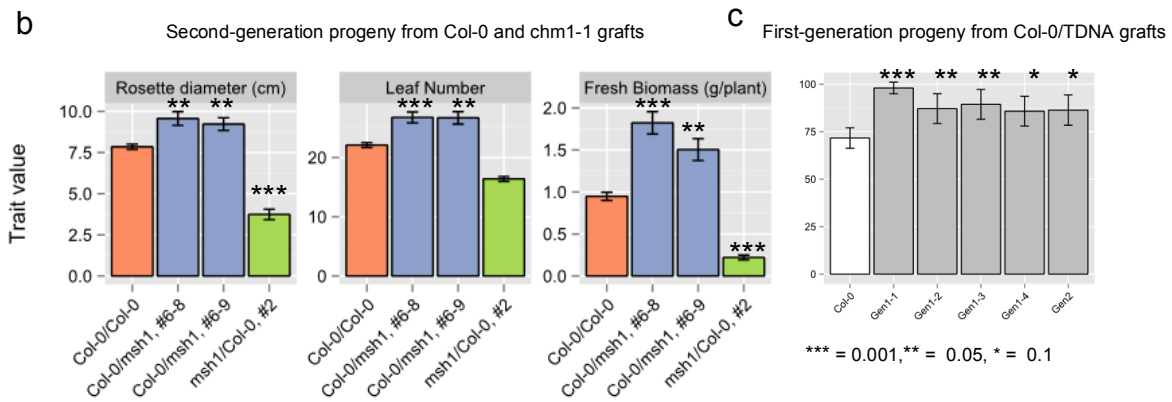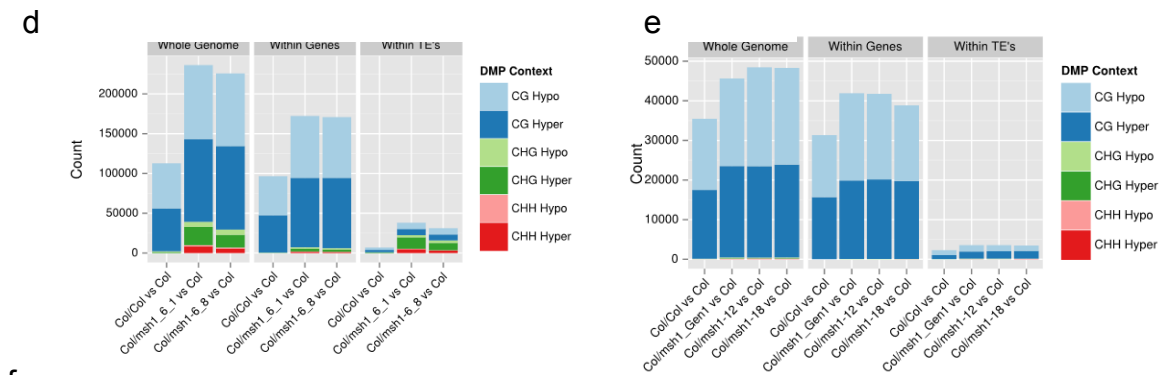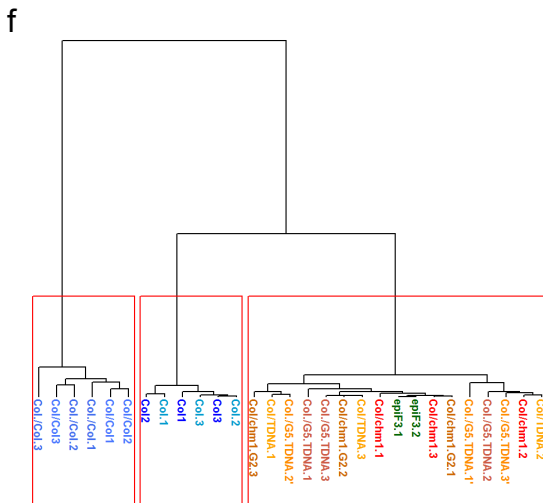

**Supplementary Figure 10.** Enhanced growth progeny from Col-0 scions grafted to *msh1*. **a**, First generation progeny from grafts involving both *chm1-1* and T-DNA *msh1* mutant root stocks used for measurements in Figure 5b. Col-0 (white arrows) **b**, Rosette diameter, leaf number and fresh biomass of second generation progeny from grafts derived by self-pollination of first generation progeny from Col-0/*chm1-1* grafts. An average of 18 plants were measured; Welch's t-test: \*, \*\*, \*\*\* significant at 0.1, 0.05, 0.001. **c**, *msh1* T-DNA influenced Col-0 scions to produce enhanced growth progeny. "Gen1" and "Gen2" indicates rootstock from first or second generation *msh1* mutants, respectively, as described in Figure 1e. **d**, Hierarchical cluster based on LDA coordinates of samples presented in Figure 5c.

**Supplementary Table 1**

|                       | Rosette diameter |    |        |      |         | Fresh biomass |    |        |      |         |
|-----------------------|------------------|----|--------|------|---------|---------------|----|--------|------|---------|
|                       | Mean (cm)        | N  | S.E.M. | S.D. | p-value | Mean (g)      | N  | S.E.M. | S.D. | p-value |
| AOX-MSH1              | 11.07            | 36 | 0.37   | 2.23 | < 0.001 | 8.86          | 10 | 0.47   | 1.33 | NS      |
| SSU-MSH1              | 11.76            | 18 | 0.26   | 1.10 | < 0.001 | 10.00         | 10 | 0.55   | 1.55 | NS      |
| Col-0                 | 12.98            | 42 | 0.24   | 1.59 | -       | 9.45          | 10 | 0.43   | 1.36 | -       |
| F-2 (AOX-MSH1xCol-0)  | 12.83            | 21 | 0.34   | 1.57 | NS      | 15.07         | 10 | 0.66   | 2.07 | < 0.001 |
| F-22 (AOX-MSH1xCol-0) | 13.82            | 21 | 0.42   | 1.92 | < 0.10  | 14.62         | 10 | 0.92   | 2.24 | < 0.001 |
| F-28 (AOX-MSH1xCol-0) | 14.85            | 21 | 0.31   | 1.42 | < 0.001 | 13.27         | 10 | 0.70   | 1.99 | < 0.001 |
| F-26 (SSU-MSH1xCol-0) | 12.82            | 20 | 0.25   | 1.12 | NS      | 10.57         | 10 | 0.66   | 1.74 | NS      |
| F-29 (SSU-MSH1xCol-0) | 11.90            | 21 | 0.27   | 1.25 | < 0.001 | 10.50         | 10 | 0.45   | 1.19 | NS      |

P-values are based on two-tailed Student *t*-tests compared to Col-0.

NS = not significant

**Supplementary Table 2**

**DMP counts. In parentheses: (% of DMPs hypermethylated , % of DMPs hypomethylated)**

|                 |                  | <i><b>WHOLE GENOME</b></i> |                       |                      |
|-----------------|------------------|----------------------------|-----------------------|----------------------|
| <b>Sample</b>   | <b>Reference</b> | <b>CG-DMPs</b>             | <b>CHG-DMPs</b>       | <b>CHH-DMPs</b>      |
| Col-0/Col-0     | Col-0            | 45955 (47.2% , 52.8% )     | 2012 (49.4% , 50.6%)  | 77 (36.4% , 63.6%)   |
| Col-0/chm1 #6   | Col-0            | 76759 (52.7% , 47.3%)      | 13421 (87.8% , 12.2%) | 3808 (87.6% , 12.4%) |
| Col-0/chm1 #6-8 | Col-0            | 77018 (53.3% , 46.7%)      | 9638 (82.4% , 17.6%)  | 2385 (80.4% , 19.6%) |

|                 |                  | <i><b>ONLY WITHIN GENES</b></i> |                      |                     |
|-----------------|------------------|---------------------------------|----------------------|---------------------|
| <b>Sample</b>   | <b>Reference</b> | <b>CG-DMPs</b>                  | <b>CHG-DMPs</b>      | <b>CHH-DMPs</b>     |
| Col-0/Col-0     | Col-0            | 38531 (48.4% , 51.6%)           | 468 (36.3% , 63.7%)  | 11 (27.3% , 72.7%)  |
| Col-0/chm1 #6   | Col-0            | 64626 (52.4% , 47.6%)           | 2091 (77.3% , 22.7%) | 645 (82.9% , 17.1%) |
| Col-0/chm1 #6-8 | Col-0            | 64830 (53.0% , 47.0%)           | 1634 (72.9% , 27.1%) | 503 (79.3% , 20.7%) |

|                 |                  | <i><b>ONLY WITHIN TE'S</b></i> |                      |                      |
|-----------------|------------------|--------------------------------|----------------------|----------------------|
| <b>Sample</b>   | <b>Reference</b> | <b>CG-DMPs</b>                 | <b>CHG-DMPs</b>      | <b>CHH-DMPs</b>      |
| Col-0/Col-0     | Col-0            | 2623 (50.7% , 49.3%)           | 820 (72.0% , 28.0%)  | 19 (57.9% , 42.1%)   |
| Col-0/chm1 #6   | Col-0            | 5909 (54.2% , 45.8%)           | 8567 (92.0% , 8.0%)  | 2178 (90.0% , 10.0%) |
| Col-0/chm1 #6-8 | Col-0            | 5902 (53.8% , 46.2%)           | 5802 (87.0% , 13.0%) | 1208 (82.6% , 17.4%) |
